# Supplementary material
Source: ML conference proceedings conference paper supplement (https://openreview.net/forum?id=wYYOdt3f3L)
Supplement: supplementary_material [file nonGauss_gap_heatmap.pdf › Counterfactual_prediction-main/Experiments/Non-Gauss_simulations/nonGauss_gap_heatmap.pdf]

$\rho = 0$ 

|                     |      |      |      |      |
|---------------------|------|------|------|------|
| gaussian x gaussian | 0.39 | 0.10 | 0.06 | 0.02 |
| gaussian x gumbel   | 0.33 | 0.10 | 0.06 | 0.02 |
| laplace x gumbel    | 0.70 | 0.18 | 0.15 | 0.03 |
| laplace x gaussian  | 0.87 | 0.18 | 0.11 | 0.03 |
| t x gaussian        | 1.02 | 0.26 | 0.18 | 0.04 |
| t x gumbel          | 0.90 | 0.26 | 0.18 | 0.05 |
| chisq x gaussian    | 2.05 | 0.60 | 0.33 | 0.09 |
| chisq x gumbel      | 1.61 | 0.56 | 0.38 | 0.07 |
|                     | 100  | 300  | 500  | 2000 |

 $\rho = 0.5$ 

|      |      |      |      |
|------|------|------|------|
| 0.50 | 0.15 | 0.08 | 0.02 |
| 0.58 | 0.17 | 0.13 | 0.06 |
| 1.10 | 0.43 | 0.31 | 0.16 |
| 1.41 | 0.33 | 0.21 | 0.08 |
| 2.00 | 0.09 | 0.19 | 0.07 |
| 2.25 | 0.79 | 0.54 | 0.28 |
| 2.67 | 1.17 | 0.53 | 0.20 |
| 3.14 | 0.99 | 0.58 | 0.31 |
| 100  | 300  | 500  | 2000 |

 $\rho = 1$ 

|      |      |      |      |
|------|------|------|------|
| 1.26 | 0.31 | 0.19 | 0.04 |
| 0.78 | 0.27 | 0.18 | 0.04 |
| 2.12 | 0.69 | 0.41 | 0.13 |
| 2.46 | 0.61 | 0.56 | 0.13 |
| 4.09 | 1.46 | 0.95 | 0.18 |
| 3.05 | 0.98 | 0.65 | 0.19 |
| 5.38 | 2.07 | 1.35 | 0.31 |
| 5.76 | 2.29 | 1.07 | 0.29 |
| 100  | 300  | 500  | 2000 |

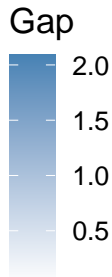

Sample size (n)
