# Supplementary material
Source: ML conference proceedings conference paper supplement (https://openreview.net/forum?id=wYYOdt3f3L)

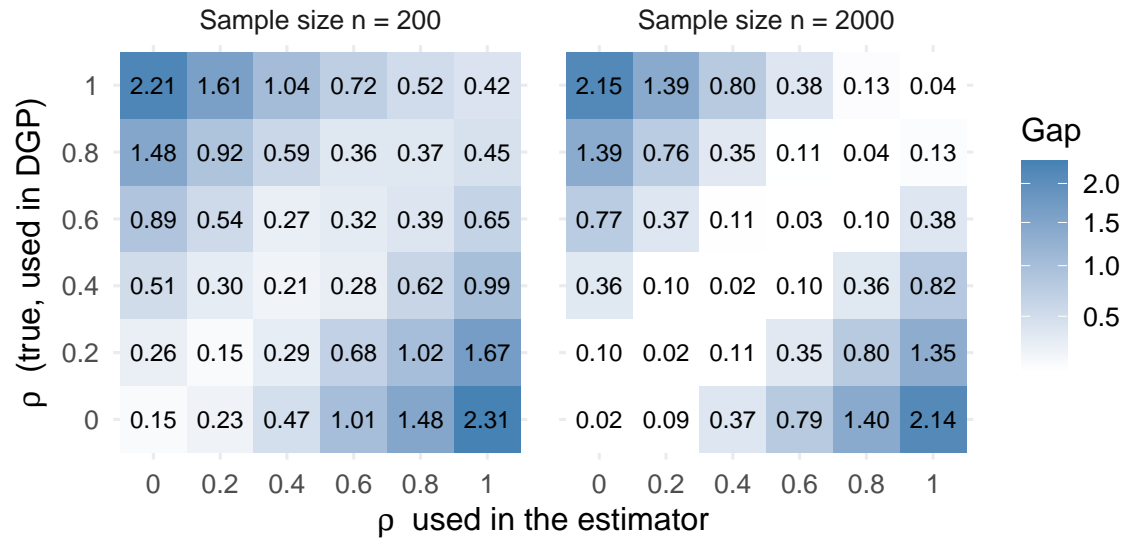

Supplement: supplementary_material [file rho_misspec_plot.pdf › Counterfactual_prediction-main/Experiments/Rho_sensitivity/rho_misspec_plot.pdf]
